# Thousands of primer-free, high-quality, full-length SSU rRNA sequences from all domains of life

Søren M. Karst\*, Morten S. Dueholm\*, Simon J. McIlroy, Rasmus H. Kirkegaard, Per H. Nielsen and Mads Albertsen\*\*

Center for Microbial Communities, Department of Chemistry and Bioscience, Aalborg University, Denmark

\*These authors contributed equally

\*\*Corresponding author: ma@bio.aau.dk

## 1 Abstract

2 Ribosomal RNA (rRNA) genes are the consensus marker for determination of microbial diversity on  
3 the planet, invaluable in studies of evolution and, for the past decade, high-throughput sequencing  
4 of variable regions of ribosomal RNA genes has become the backbone of most microbial ecology  
5 studies. However, the underlying reference databases of full-length rRNA gene sequences are  
6 underpopulated, ecosystem skewed<sup>1</sup>, and subject to primer bias<sup>2</sup>, which hamper our ability to study  
7 the true diversity of ecosystems. Here we present an approach that combines reverse transcription  
8 of full-length small subunit (SSU) rRNA genes and synthetic long read sequencing by molecular  
9 tagging, to generate primer-free, full-length SSU rRNA gene sequences from all domains of life, with  
10 a median raw error rate of 0.17%. We generated thousands of full-length SSU rRNA sequences from  
11 five well-studied ecosystems (soil, human gut, fresh water, anaerobic digestion, and activated  
12 sludge) and obtained sequences covering all domains of life and the majority of all described phyla.  
13 Interestingly, 30% of all bacterial operational taxonomic units were novel, compared to the SILVA  
14 database (less than 97% similarity). For the Eukaryotes, the novelty was even larger with 63% of all  
15 OTUs representing novel taxa. In addition, 15% of the 18S rRNA OTUs were highly novel sequences  
16 with less than 80% similarity to the databases. The generation of primer-free full-length SSU rRNA  
17 sequences enabled eco-system specific estimation of primer-bias and, especially for eukaryotes,  
18 showed a dramatic discrepancy between the *in-silico* evaluation and primer-free data generated in  
19 this study. The large amount of novel sequences obtained here reaffirms that there is still vast,  
20 untapped microbial diversity lacking representatives in the SSU rRNA databases and that there might  
21 be more than millions after all<sup>1,3</sup>. With our new approach, it is possible to readily expand the rRNA  
22 databases by orders of magnitude within a short timeframe. This will, for the first time, enable a  
23 broad census of the tree of life.

24 To obtain primer-free and full-length SSU rRNA sequences, we combined and optimized methods for  
25 producing full-length SSU rRNA cDNA from total RNA<sup>4,5</sup> with synthetic long read sequencing enabled by  
26 molecular tagging<sup>6,7,8,9</sup>. Full-length SSU rRNA molecules were enriched from extracted total RNA and  
27 converted to double-stranded cDNA, enabled by poly(A) tailing and single-stranded ligation, thereby  
28 avoiding the use of conventional SSU rRNA PCR primers and the resulting taxonomic bias<sup>10</sup> (Fig. 1A).  
29 During first and second strand cDNA synthesis, the individual SSU rRNA molecules are uniquely tagged

30 in both termini. The tagging enables preparation of short read sequencing libraries, where the resulting  
31 individual sequencing reads can be linked to the original template molecule. By sorting the short reads  
32 into separate bins based on their unique tag, full-length SSU rRNA molecules can afterwards be  
33 recreated using *de novo* assembly of the individual bins.

#### 34 **Mock community evaluation**

35 To estimate error and chimera rate of the method, we applied it to a mock community containing *E.*  
36 *coli* MG 1655, *B. subtilis* str 168, and *P. aeruginosa* PAO1, each with multiple 16S rRNA gene copies (4-  
37 10) that differ internally in 0 to 19 positions (up to 1.3% internal divergence). In a single Illumina MiSeq  
38 run, we generated 9,608 16S rRNA gene sequences over 1,200 bp (median 1,537 bp, **Fig. 1B**) with an  
39 average raw error rate of 0.17% (**Fig. 1C**) and a chimera rate of 0.19%. The raw error-rate corresponds  
40 well with the theoretical error-rate of the Taq DNA polymerase used in the PCR steps. Using standard  
41 error-correction, the average error-rate was reduced to 0.04%, with 62% of the sequences being  
42 perfect. The chimera-rate of 0.19% is up to 100 times lower than what can be observed in conventional  
43 PCR based studies<sup>11</sup>.

44 Even without error correction, the low error-rate enabled assignment of all full-length 16S rRNA  
45 sequences to their respective operons, exemplifying the resolving power of the method (**Fig. 1D and**  
46 **Fig. S2**). Interestingly, for *B. subtilis* three of the rRNA operons (*rrn-I*, *rrn-H*, and *rrn-G*) were not  
47 expressed. However, these are located closely together in the genome and also regulated by the same  
48 promoter<sup>12</sup>.

49 Earlier studies have indicated risk of taxa dependent biases in poly(A) tailing, due to modifications of  
50 the 3'-terminal ribonucleotide unit<sup>4,5</sup>, as well as biases from disruption of first strand synthesis due to  
51 internal modifications<sup>13,14</sup>. To investigate potential taxonomic bias, we compared full-length SSU rRNA  
52 sequences obtained from an activated sludge sample with total RNA shotgun sequencing of the same  
53 extracted RNA. All abundant taxa that were observed using shotgun RNA sequencing were also  
54 observed in the full-length sequences (**Fig. S3**).

#### 55 **Error-correction of Oxford Nanopore data using molecular tagging**

56 Tagging of individual molecules has been used as an effective consensus error-correction strategy in  
57 Illumina data<sup>15,16</sup> and the principle is similar to the circular amplification strategies used to error-correct  
58 PacBio<sup>17,18,19</sup> and Oxford Nanopore data<sup>20</sup>. Here we used the mock-community cDNA, designed for use  
59 on the Illumina MiSeq, and used it directly for Oxford Nanopore library preparation and MinION  
60 sequencing. Using uniquely tagged Nanopore reads and applying a naïve clustering and error-  
61 correction strategy, we increased the similarity from a median of 90% (range 69-97%) for the raw reads  
62 to a median of 99% for consensus reads generated from 7 or more tagged reads (range 98.7-99.6%,  
63 **(Fig. S4; Table S1)**). With few additional adaptations, the molecular tagging approach can be optimized  
64 for use on the Oxford Nanopore platform, which should result in even lower error-rates, even for long  
65 DNA reads, currently not feasible for the circular amplification strategies.

#### 66 **The method applied to real environmental samples**

67 We used the full-length SSU rRNA approach to analyze samples from five widely studied ecosystems –  
68 soil, fresh water, human gut, anaerobic digestion (biogas production), and activated sludge  
69 (wastewater treatment). An average of 8685 rRNA sequences longer than 1,200 bp (median 1,434 bp)  
70 was obtained from each sample (**Table S2**). Each sequenced on a single Illumina MiSeq run. SSU rRNA  
71 made up 25-47% of all sequences, while large subunit (LSU) rRNA fragments made up the majority of  
72 the remaining sequences. The relative large fraction of LSU rRNA was unexpected, as the SSU rRNA  
73 peak was enriched using gel electrophoresis size selection (**Fig. S5**). However, LSU rRNA of many  
74 bacteria and lower eukaryotes also exist as nicked molecules, where one of the fragments has  
75 approximately the same size as the SSU rRNA<sup>21,22</sup>. In addition, degradation of stable RNA is more  
76 pronounced under conditions of starvation or environmental stress<sup>14</sup>. This is also in accordance with  
77 the experimental results obtained in this study, where more LSU rRNA was observed for the complex  
78 samples (53-75%) than for the mock community (8%).

79 We obtained SSU rRNA sequences from all domains of life, with representatives from 45 out of 66  
80 bacterial phyla in the SILVA database<sup>23</sup> including the majority of the known candidate phyla (**Fig. 2A**).  
81 To demonstrate that the method scales with sequencing capacity, we generated additional 62,140  
82 rRNA sequences longer than 1,200 bp from the soil sample using a single Illumina HiSeq rapid run. From  
83 the single soil sample, we obtained 19,754 bacterial 16S rRNA sequences, which is equivalent to 18% of  
84 all soil-related sequences ever added to the databases<sup>1</sup>. Additionally, the 892 novel OTUs (97%  
85 clustering and > 3% difference to the SILVA database) obtained from the single soil sample, represent  
86 8% of the new OTUs that are added to the SILVA database in a year<sup>1</sup>. For most environments, a single  
87 MiSeq sequencing run would add more eco-system specific sequences than ever added to the database  
88 for the particular environment.

### 89 **Evaluation of bacterial diversity**

90 Compared to the SILVA database, 30% of the full-length bacterial 16S rRNA OTUs represented new  
91 diversity (97% clustering and > 3% difference to the SILVA database). The degree of novelty was highly  
92 ecosystem specific. In the soil sample, 36% of the bacterial OTUs were novel compared to the database,  
93 while it was 5% in the human gut sample. These results underline that even in the densely sampled  
94 environments, as investigated in this study, a vast amount of bacterial diversity remains to be explored.  
95 We have refrained from attempting to define novel high-level phylogenetic groups based on our data,  
96 as it seems premature, when the databases will increase with orders of magnitude within a short  
97 timeframe. This will form a better foundation for robustly defining new phylogenetic groups.

98 A recent evaluation of primer bias using metagenomics estimated that up to 10% of bacterial diversity  
99 could be missed by conventional applied primers<sup>2</sup>. The generation of primer-free full-length 16S rRNA  
100 sequences in this study made it possible to access the conservation of the 27f and 1492r primers  
101 commonly used for generation of full-length sequences in the databases<sup>24,25</sup>. We found that 0 to 6% of  
102 full-length 16S rRNA OTUs had two or more mismatches to either the 27f or 1492r primer, depending  
103 on the environment (**Table S3**).

### 104 **Evaluation of eukaryotic diversity**

105 In general, the eukaryotic 18S rRNA phylogeny is not well developed, especially not for the unicellular  
106 micro-eukaryotes. Universal eukaryotic primers have a poor coverage<sup>26,27</sup> and they provide short  
107 amplicons with poor phylogenetic resolution<sup>28,29</sup>. To support this, we found a very high degree of novel  
108 eukaryotic diversity, when applying the primer-free approach. In total, 63% of the 18S rRNA OTUs were  
109 less than 97% similar to anything in the SILVA database (**Fig. 2B**), with 15% of all sequences being less  
110 than 80% similar to any known sequences. Recently, Hadziavdic *et al.* (2014) developed a new set of  
111 universal primers for Eukaryotes, which target 76% of the SILVA database with perfect match and 93%  
112 with a single mismatch. Strikingly, when applied to the primer-free generated 18S rRNA sequences  
113 from this study, only 8% had perfect match to the primers and 80% had one mismatch (**Table S4**).

114 The new Eukaryotic Reference Database initiative (<http://eukref.org/>) has the goal to improve the  
115 eukaryotic reference databases. It is a collaborative annotation initiative to curate eukaryotic lineages  
116 by 18S rRNA gene data spanning the eukaryotic tree of life. Our full-length primer free approach will  
117 strongly support this endeavor and increase the power of high-throughput sequencing-based studies to  
118 discover fundamental patterns in microbial ecology.

### 119 **The beginning of a new era with a fully populated tree of life**

120 The approach has fascinating perspectives in rapidly populating the tree of life. In this study alone, we  
121 have generated more than 30,000 full-length 16S rRNA gene sequences, which is approximately 15% of  
122 all sequences that were added to SILVA in 2015<sup>1</sup>. Our overall discovery rate of new diversity is higher  
123 than previously estimated based on the current databases<sup>1</sup> and underlines that it is currently difficult to  
124 estimate the total bacterial diversity in the biosphere.

125 As the method is scalable and optimized to the most prevalent sequencing platform of today, we  
126 foresee a drastic increase in full-length SSU rRNA sequences that will be generated from all  
127 environments. It will be a monumental task to update the databases and difficult to maintain a  
128 phylogenetic tree encompassing all diversity. Our prediction is that ecosystem-specific databases, such  
129 as the human oral microbiome database<sup>30</sup>, will become more prevalent. Albeit decentralized, these  
130 databases might be easier to maintain and more information can be assigned to individual organisms  
131 based on the ecosystem context, which will make the databases more useful in practice.

132 It will be increasingly difficult to design both universal and specific primers. Instead, the high quality  
133 ecosystems-specific databases will be key to design new amplicon sequencing primers and fluorescence  
134 in situ hybridization (FISH) probes. For amplicon sequencing, this would mean better community  
135 coverage, compared to current universal primers. For FISH probes, it would be possible to design more  
136 specific probes, that increase the resolution of in situ single cell physiology studies, thereby aiding the  
137 task of linking identity and function in complex microbial communities.

138 In this study, we also recovered over 62,420 partial LSU rRNA fragments (1,200-1,600 bp). For  
139 comparison, there are 96,642 LSU rRNA sequences in the current release of the SILVA database (over  
140 1,900 bp). Although the current implementation is limited to approximately 1,600 bp in order to  
141 maximize the yield of 16S rRNA sequences, a variation of the applied sequencing method has been  
142 demonstrated to yield multi-kb reads<sup>9</sup>. In addition, the promising error-correction of raw Nanopore

143 reads demonstrated here is not limited by read length. Hence, also the LSU rRNA databases will  
144 experience a dramatic increase in the very near future.

145 The approach itself will allow researchers in microbiology and biology to get a complete community  
146 profile encompassing bacteria, archaea and eukaryotes, which has been difficult before. This would  
147 make it possible to look at interactions between the different domains of life in ecosystems, which  
148 have been scarcely studied until now.

#### 149 **Acknowledgements**

150 The study was funded by the Danish Research Council for Independent Research (FTP), the Innovation  
151 Fund Denmark, the Villum Foundation, and the Poul Due Jensen (Grundfos) Foundation We thank  
152 Holger Daims for insightful discussions of the manuscript.

153

154 **Figure Text**

155 **Figure 1. Overview and validation of full-length SSU rRNA sequencing.** **a**, Schematic overview of the  
156 preparation of full-length SSU rRNA gene sequences from total community RNA (See **Fig. S1** for a  
157 detailed overview). First, SSU rRNA is enriched from extracted total community RNA using size  
158 selection. Then the SSU rRNA is polyadenylated, followed by reverse transcription and second strand  
159 synthesis. Adaptors used for first and second strand synthesis contain unique tags (green and blue),  
160 which in combination, become the unique “linked-tags” of the molecules. The cDNA is amplified with  
161 PCR and the product size selected to remove incomplete or truncated products. The full-length SSU  
162 rRNA amplicons are diluted to 10,000 – 300,000 molecules and amplified with PCR. The PCR product is  
163 split in two and used for preparing a read-tag library and a linked-tag library. The read-tag library is  
164 prepared by fragmenting the full-length SSU rRNA amplicons using Nextera tagmentation and library  
165 preparation. The resulting sequencing outcome is an internal SSU rRNA fragment read connected to a  
166 single unique tag read. The linked-tag library is prepared by circularizing full-length SSU rRNA amplicons  
167 to physically link the tags in close proximity. PCR is used to amplify the linked-tags, which are then  
168 identified with sequencing. The linked-tags are used to bin all SSU rRNA fragment tag-reads originating  
169 from the same parent molecule. Finally, *de novo* assembly is used to recreate the parent SSU rRNA  
170 sequence. **b**, Size distribution of assembled SSU rRNA sequences from the mock community. **c**, Error  
171 count distribution for raw SSU rRNA sequences from the mock community (Numbers indicate percent  
172 of all 16S rRNA sequences). **d**, The relative abundance of the different 16S rRNA genes for *B. subtilis*.

173 **Figure 2. Coverage of the tree of life.** **a**, Insertion of the newly generated SSU rRNA sequences to the  
174 current tree of life<sup>31</sup>. Brown branches represent sequences already in the public databases, and the  
175 other colors illustrate sequences added in this study. Note that the HiSeq soil data is not included. **b**,  
176 The percent identity of SSU rRNA gene sequences in the samples compared to their closest relatives in  
177 the SILVA database.

178

179 **References**

- 180 1. Schloss, P. D., Girard, R. A., Martin, T., Edwards, J. & Thrash, J. C. Status of the Archaeal and  
181 Bacterial Census: an Update. *MBio* **7**, e00201–16 (2016).
- 182 2. Eloë-Fadrosch, E. A., Ivanova, N. N., Woyke, T. & Kyrpides, N. C. Metagenomics uncovers gaps in  
183 amplicon-based detection of microbial diversity. *Nat. Microbiol.* 15032 (2016).  
184 doi:10.1038/nmicrobiol.2015.32
- 185 3. Amann, R. & Rosselló-Móra, R. After All, Only Millions? *MBio* **7**, e00999–16 (2016).
- 186 4. Botero, L. M. *et al.* Poly(A) polymerase modification and reverse transcriptase PCR amplification  
187 of environmental RNA. *Appl. Environ. Microbiol.* **71**, 1267–75 (2005).
- 188 5. Hoshino, T. & Inagaki, F. A comparative study of microbial diversity and community structure in  
189 marine sediments using poly(A) tailing and reverse transcription-PCR. *Front. Microbiol.* **4**, 160  
190 (2013).
- 191 6. Hiatt, J. B., Patwardhan, R. P., Turner, E. H., Lee, C. & Shendure, J. Parallel, tag-directed assembly  
192 of locally derived short sequence reads. *Nat. Methods* **7**, 119–122 (2010).
- 193 7. Hong, L. Z. *et al.* BAsE-Seq: a method for obtaining long viral haplotypes from short sequence  
194 reads. *Genome Biol.* **15**, 517 (2014).
- 195 8. Burke, C. & Darling, A. E. *Resolving microbial microdiversity with high accuracy full length 16S*  
196 *rRNA Illumina sequencing.* *bioRxiv* (2014). doi:10.1101/010967
- 197 9. Stapleton, J. A. *et al.* Haplotype-Phased Synthetic Long Reads from Short-Read Sequencing. *PLoS*  
198 *One* **11**, e0147229 (2016).
- 199 10. Eloë-Fadrosch, E. A., Ivanova, N. N., Woyke, T. & Kyrpides, N. C. Metagenomics uncovers gaps in  
200 amplicon-based detection of microbial diversity. *Nat. Microbiol.* **1**, 15032 (2016).
- 201 11. Haas, B. J. *et al.* Chimeric 16S rRNA sequence formation and detection in Sanger and 454-  
202 pyrosequenced PCR amplicons. *Genome Res.* **21**, 494–504 (2011).
- 203 12. Rosenberg, A., Sinai, L., Smith, Y. & Ben-Yehuda, S. Dynamic expression of the translational  
204 machinery during *Bacillus subtilis* life cycle at a single cell level. *PLoS One* **7**, e41921 (2012).
- 205 13. Motorin, Y., Muller, S., Behm-Ansmant, I. & Branlant, C. Identification of Modified Residues in  
206 RNAs by Reverse Transcription-Based Methods. *Methods Enzymol.* **425**, 21–53 (2007).
- 207 14. Deutscher, M. P. Degradation of Stable RNA in Bacteria. *J. Biol. Chem.* **278**, 45041–45044 (2003).
- 208 15. Kivioja, T. *et al.* Counting absolute numbers of molecules using unique molecular identifiers.  
209 *Nat. Methods* **9**, 72–4 (2012).
- 210 16. Zhang, T.-H., Wu, N. C. & Sun, R. A benchmark study on error-correction by read-pairing and tag-  
211 clustering in amplicon-based deep sequencing. *BMC Genomics* **17**, 108 (2016).
- 212 17. Travers, K. J., Chin, C.-S., Rank, D. R., Eid, J. S. & Turner, S. W. A flexible and efficient template  
213 format for circular consensus sequencing and SNP detection. *Nucleic Acids Res.* **38**, e159 (2010).
- 214 18. Schloss, P. D., Westcott, S. L., Jenior, M. L. & Highlander, S. K. Sequencing 16S rRNA gene  
215 fragments using the PacBio SMRT DNA sequencing system. *PeerJ Prepr.* **3**, e778v1 (2015).

- 216 19. Singer, E. *et al.* High-resolution phylogenetic microbial community profiling. *ISME J.* 1–13 (2016).  
217 doi:10.1038/ismej.2015.249
- 218 20. Li, C. *et al.* INC-Seq: accurate single molecule reads using nanopore sequencing. *Gigascience* **5**,  
219 34 (2016).
- 220 21. Kordes, E., Jock, S., Fritsch, J., Bosch, F. & Klug, G. Cloning of a gene involved in rRNA precursor  
221 processing and 23S rRNA cleavage in *Rhodobacter capsulatus*. *J. Bacteriol.* **176**, 1121–1127  
222 (1994).
- 223 22. Schuch, W. & Loening, U. E. The ribosomal ribonucleic acid of *Agrobacterium tumefaciens*.  
224 *Biochem. J.* **149**, 17–22 (1975).
- 225 23. Quast, C. *et al.* The SILVA ribosomal RNA gene database project: improved data processing and  
226 web-based tools. *Nucleic Acids Res.* **41**, D590–6 (2013).
- 227 24. Klindworth, A. *et al.* Evaluation of general 16S ribosomal RNA gene PCR primers for classical and  
228 next-generation sequencing-based diversity studies. *Nucleic Acids Res.* **41**, 1–11 (2013).
- 229 25. Muyzer, G., Teske, A., Wirsén, C. O. & Jannasch, H. W. Phylogenetic relationships  
230 of *Thiomicrospira* species and their identification in deep-sea hydrothermal vent samples by  
231 denaturing gradient gel electrophoresis of 16S rDNA fragments. *Arch. Microbiol.* **164**, 165–172  
232 (1995).
- 233 26. Hadziavdic, K. *et al.* Characterization of the 18S rRNA gene for designing universal eukaryote  
234 specific primers. *PLoS One* **9**, e87624 (2014).
- 235 27. Amaral-Zettler, L. A., McCliment, E. A., Ducklow, H. W. & Huse, S. M. A method for studying  
236 protistan diversity using massively parallel sequencing of V9 hypervariable regions of small-  
237 subunit ribosomal RNA Genes. *PLoS One* **4**, 1–9 (2009).
- 238 28. Bates, S. T. *et al.* Global biogeography of highly diverse protistan communities in soil. *ISME J.* **7**,  
239 652–659 (2013).
- 240 29. Jacquiod, S. *et al.* Metagenomes provide valuable comparative information on soil  
241 microeukaryotes. *Res. Microbiol.* **167**, 436–50 (2016).
- 242 30. Chen, T. *et al.* The Human Oral Microbiome Database: a web accessible resource for  
243 investigating oral microbe taxonomic and genomic information. *Database* **2010**, baq013–  
244 baq013 (2010).
- 245 31. Hug, L. A. *et al.* A new view of the tree of life. *Nat. Microbiol.* **1**, 16048 (2016).  
246



Figure 1

a

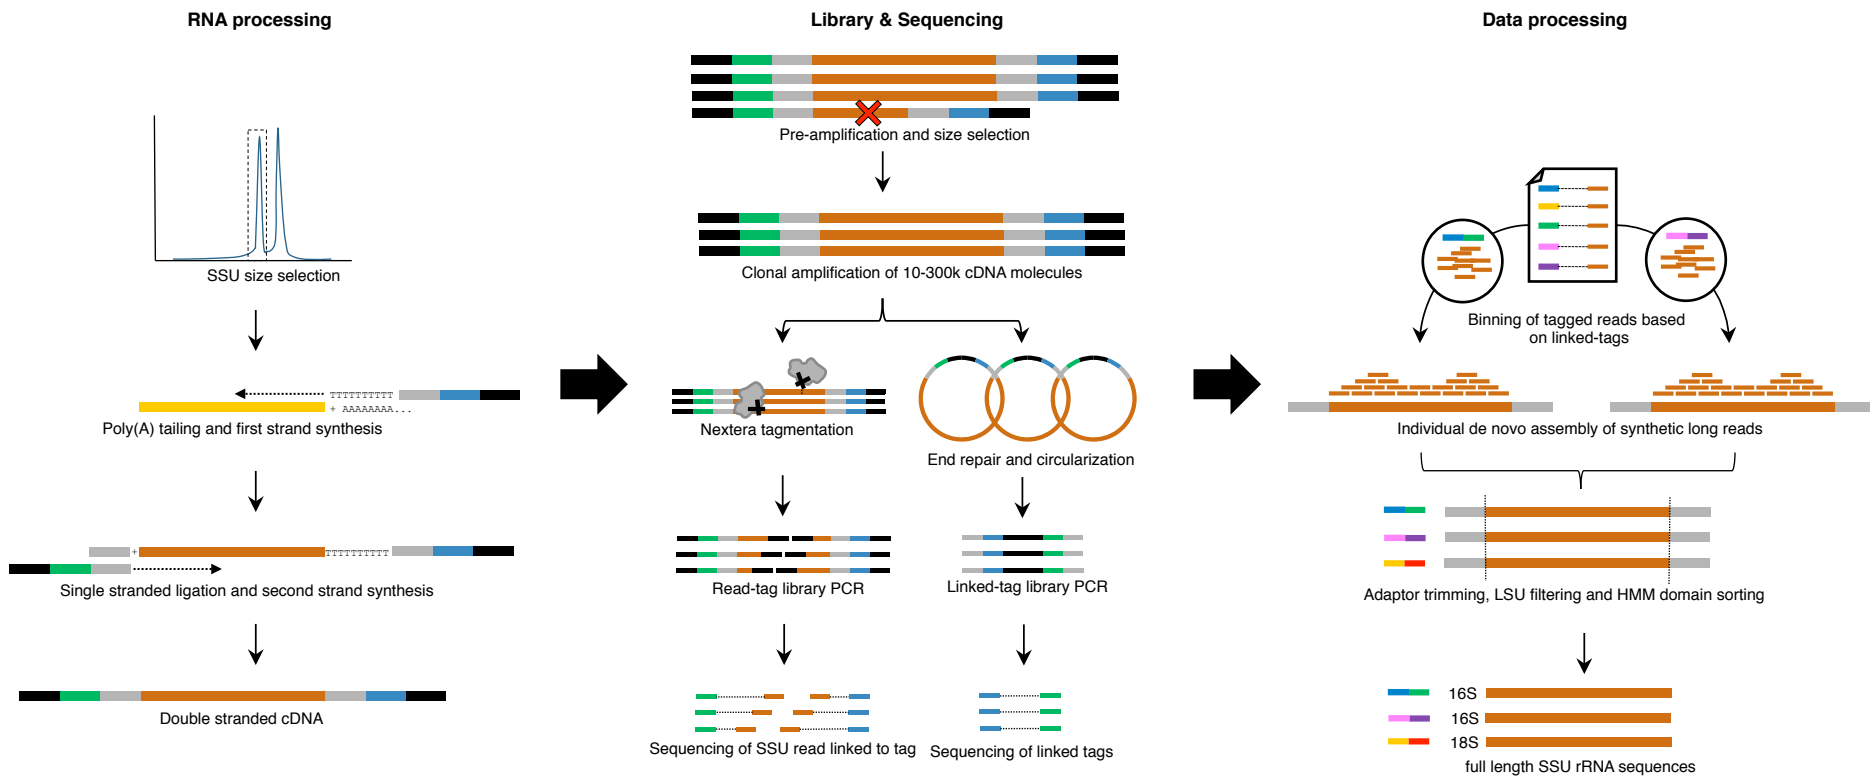

b

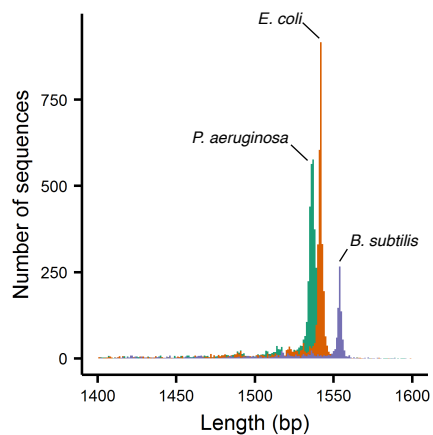

c

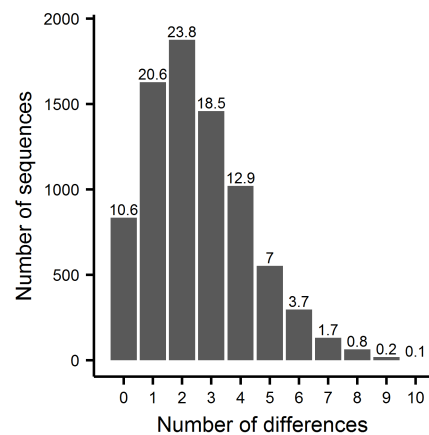

d

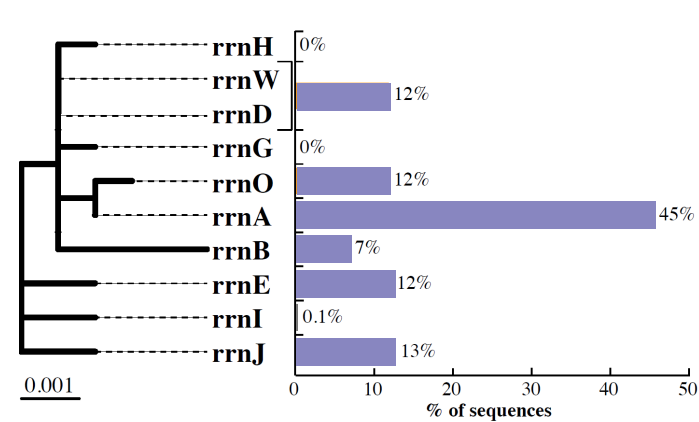

Figure 2

- a**
- Reference sequences
  - Fresh water
  - Soil
  - Human gut
  - Activated sludge
  - Anaerobic digester

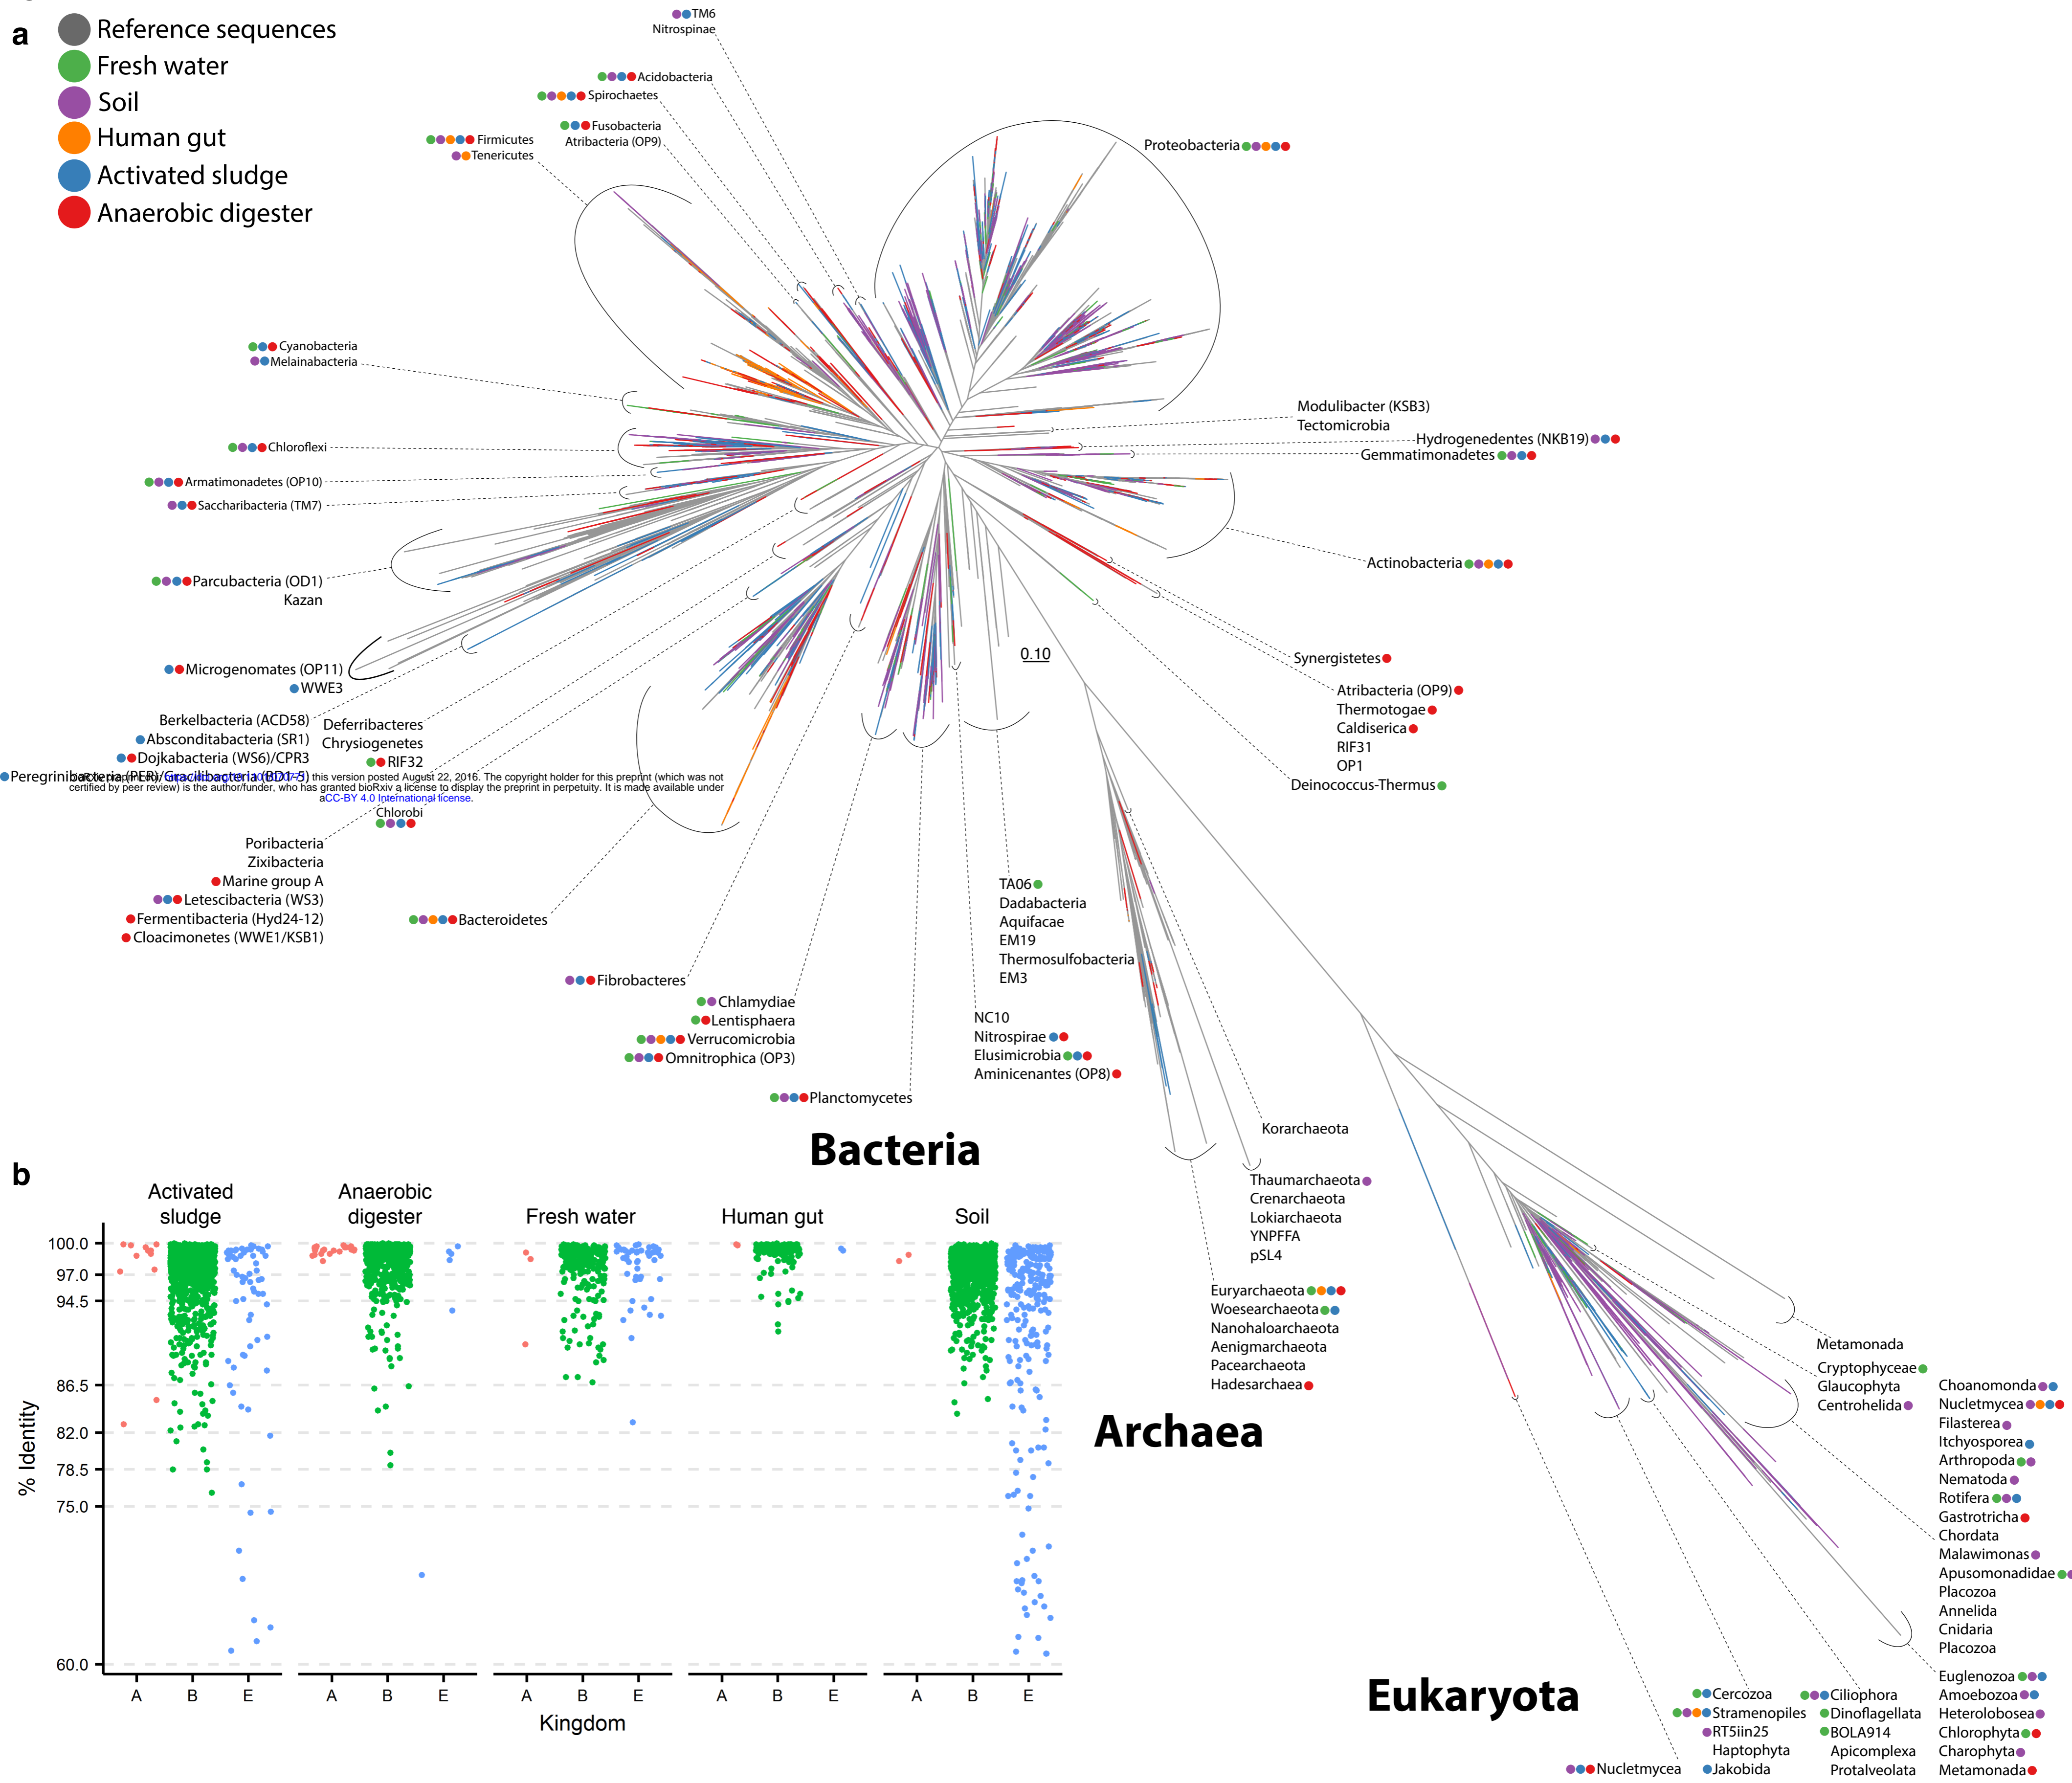

This version posted August 22, 2016. The copyright holder for this preprint (which was not certified by peer review) is the author/funder, who has granted bioRxiv a license to display the preprint in perpetuity. It is made available under aCC-BY 4.0 International license.
